# Supplementary material for: Nano-γ-Al2O3/SbCl5: an efficient catalyst for the synthesis of 2,3-dihydroperimidines
Source: Royal Society of Chemistry journal article supplement (doi:10.1039/c7ra13593a), 2018-01-01
Supplement: c7ra13593a1.pdf [file c7ra13593a1.pdf]

## Nano- $\gamma$ - $\text{Al}_2\text{O}_3/\text{SbCl}_5$ : an efficient catalyst for the synthesis of 2, 3-dihydroperimidines

Abdolhamid Bamoniri<sup>\*a</sup>, Bi Bi Fatemeh Mirjalili<sup>b</sup> and Sepideh Saleh<sup>a</sup>

<sup>a</sup>Departement of Org. Chem., Faculty of Chem., University of Kashan, Kashan, I. R. Iran

<sup>b</sup>Department of Chem., College of Sci., Yazd University, Yazd, I. R. Iran

### Physical and spectral data

**2-(4-Chlorophenyl)-2, 3-dihydro-1H-perimidine (Table 2, 3a).** IR (KBr): 3387, 3034, 2798, 1598, 1482, 1418  $\text{cm}^{-1}$ . <sup>1</sup>HNMR (DMSO, 400MHz):  $\delta$  5.354 (s, 1H, CH), 6.47 (d, 2H,  $J=7.176$ ). 6.790 (s, 1H, NH, exchange with D<sub>2</sub>O), 6.97(d, 2H,  $J=7.66$  Hz) 7.13 (d, 2H,  $J=7.55$  Hz) 7.162 (s, 1H, NH, exchange with D<sub>2</sub>O) 7.475 (d, 2H,  $J=7.95$ Hz) 7.60 (d, 2H,  $J=7.95$ Hz) <sup>13</sup>CNMR (DMSO) [28]: 66.4, 104.4, 112.5, 115.3, 126.8, 127.9, 128.2, 128.5, 134.4, 141.8, 143.0.

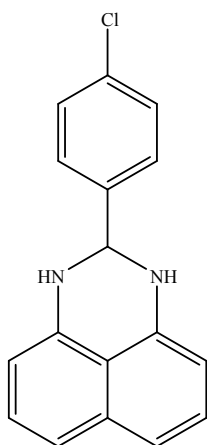

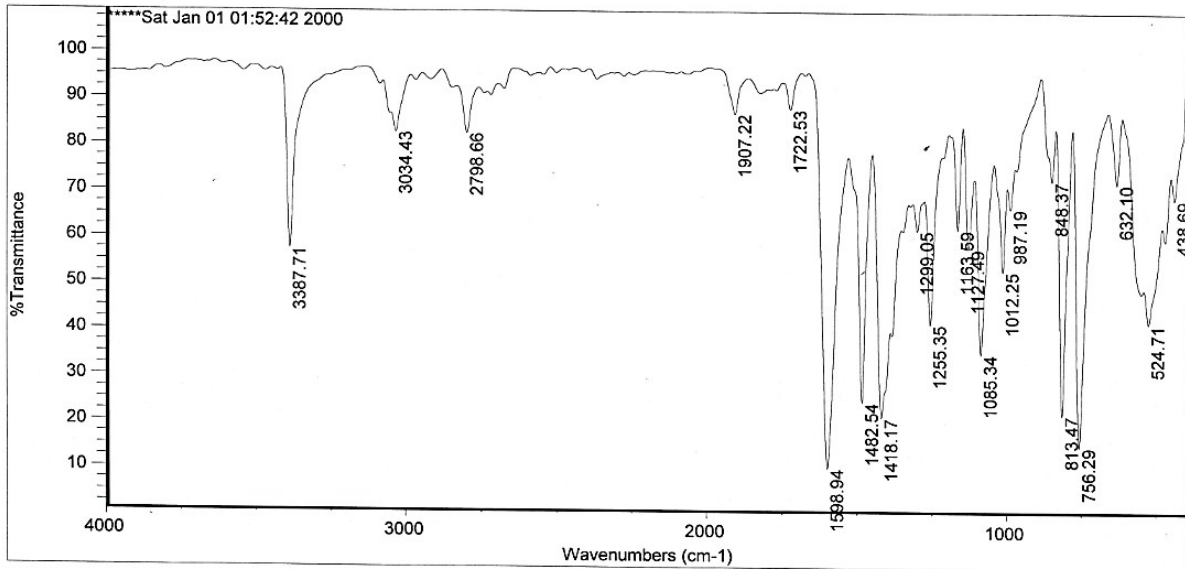

FT-IR spectrum of 2-(4-chlorophenyl)-2,3-dihydro-1H-perimidine

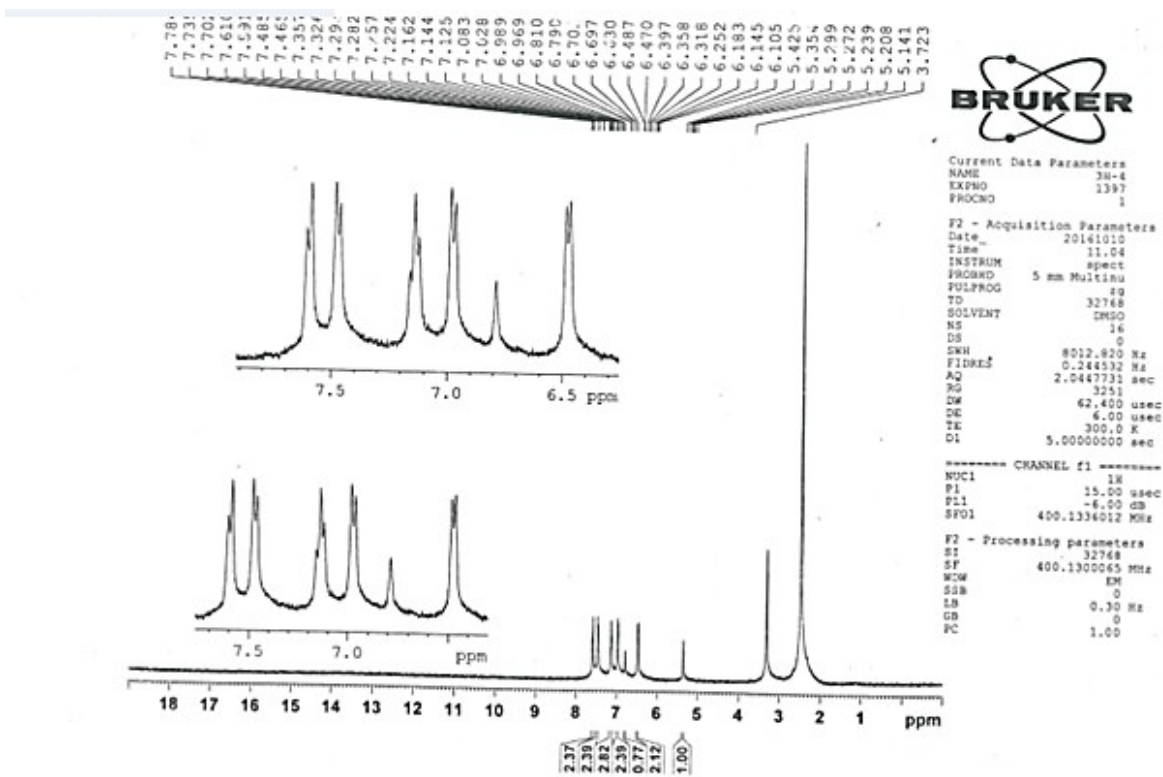

<sup>1</sup>H NMR spectrum of 2-(4-chlorophenyl)-2,3-dihydro-1H-perimidine

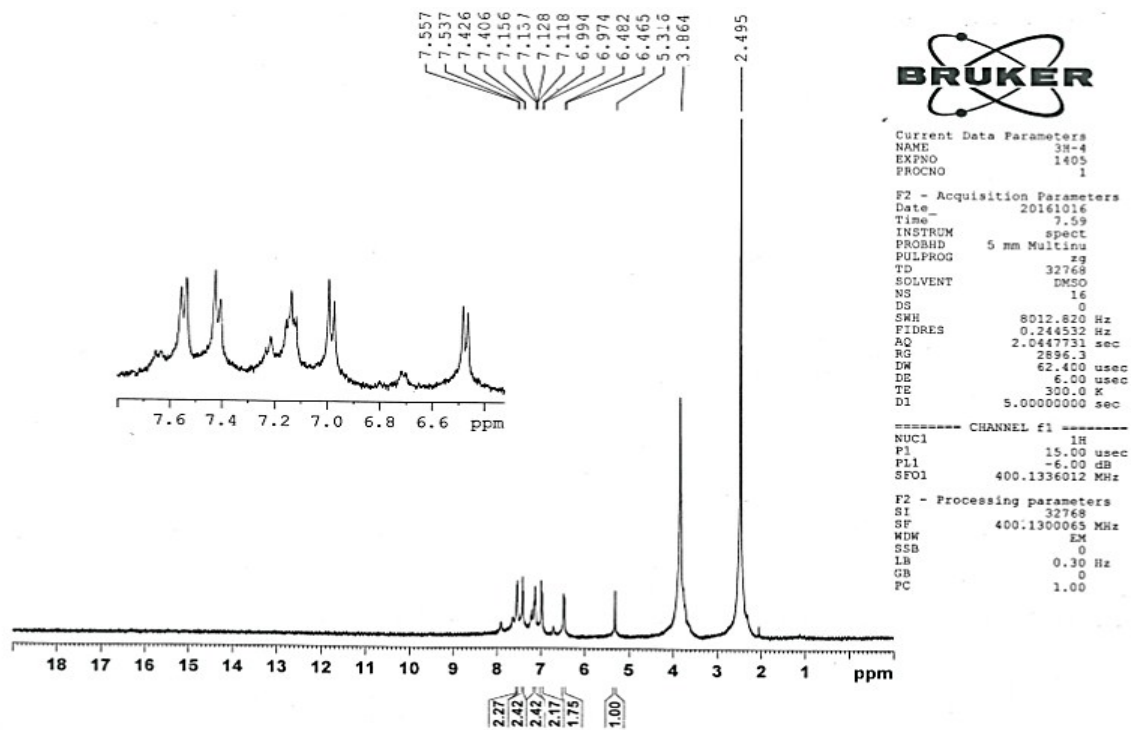

**<sup>1</sup>H NMR spectrum of 2-(4-chlorophenyl)-2, 3-dihydro-1*H*-perimidine in the presence of D<sub>2</sub>O**

**2-(2-Nitrophenyl)-2, 3-dihydro-1*H*perimidine (Table 2, 3b).** IR (KBr): 3359, 3230, 3046, 2848, 1603, 1517, 1412 cm<sup>-1</sup>. <sup>1</sup>HNMR (DMSO, 400MHz): δ 3.345 (s, 1H, NH, exchange with D<sub>2</sub>O), 5.792 (s, 1H, CH), 6.51 (d, 2H, *J*=7.2). 6.8 (s, 1H, NH, exchange with D<sub>2</sub>O), 7.01 (d, 2H, *J*=8.4 Hz) 7.16(t, 2H, *J*=8 Hz) 7.61 (t, 2H, *J*=8 Hz) 7.75(t, 1H, *J*=6,8 Hz)7.89 (d, 2H, *J*= 8Hz) 8.02 (d, 2H, *J*= 8Hz) <sup>13</sup>CNMR (DMSO, 75 MHz) [23]: δ 61.4, 105.2, 112.5, 116.2, 124.6 127.5, 130.0, 130.4, 134.0, 134.7, 136.9, 142.5, 149.4.

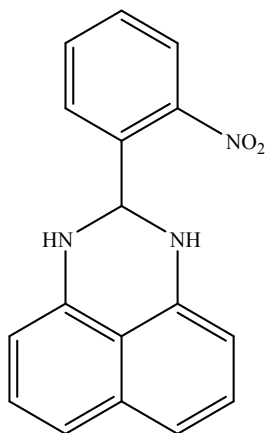

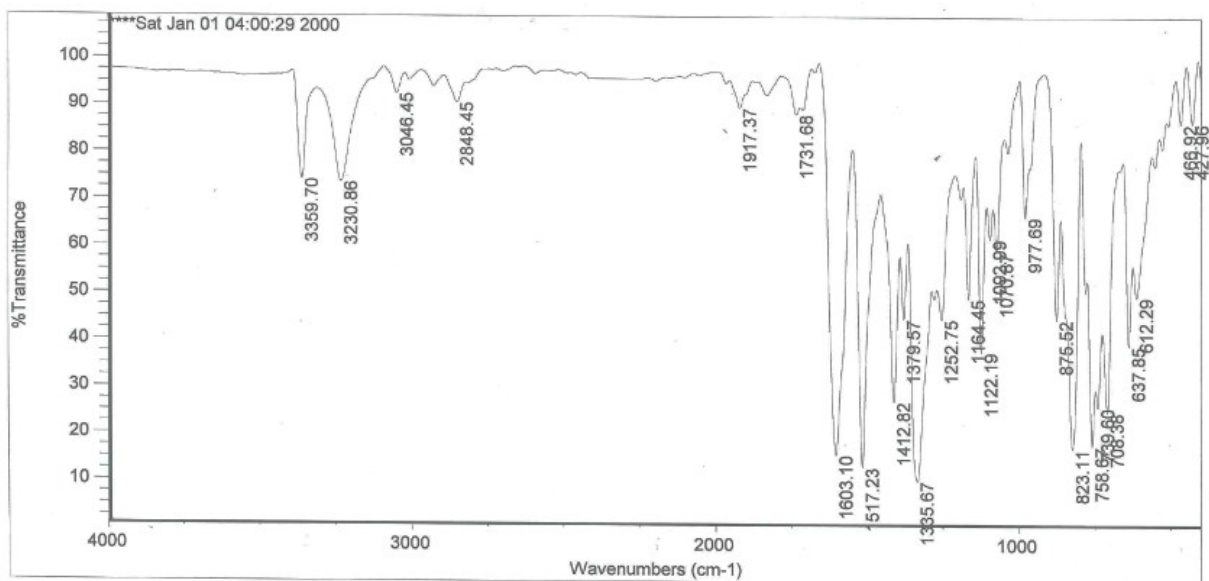

FT-IR spectrum of 2-(2-nitrophenyl)-2,3-dihydro-1H-perimidine

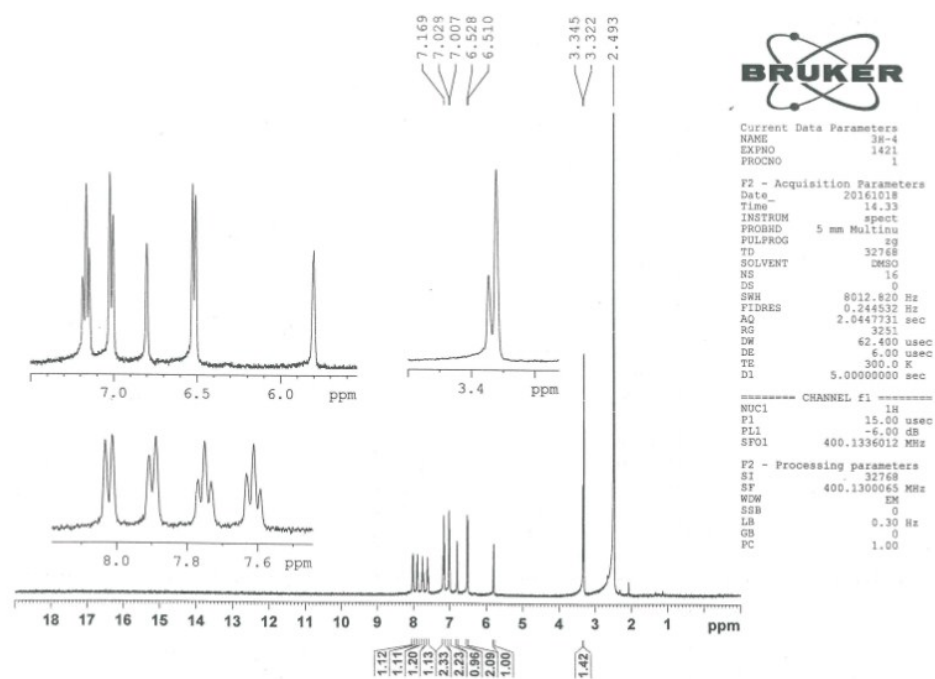

<sup>1</sup>H NMR spectrum of 2-(2-nitrophenyl)-2,3-dihydro-1H-perimidine

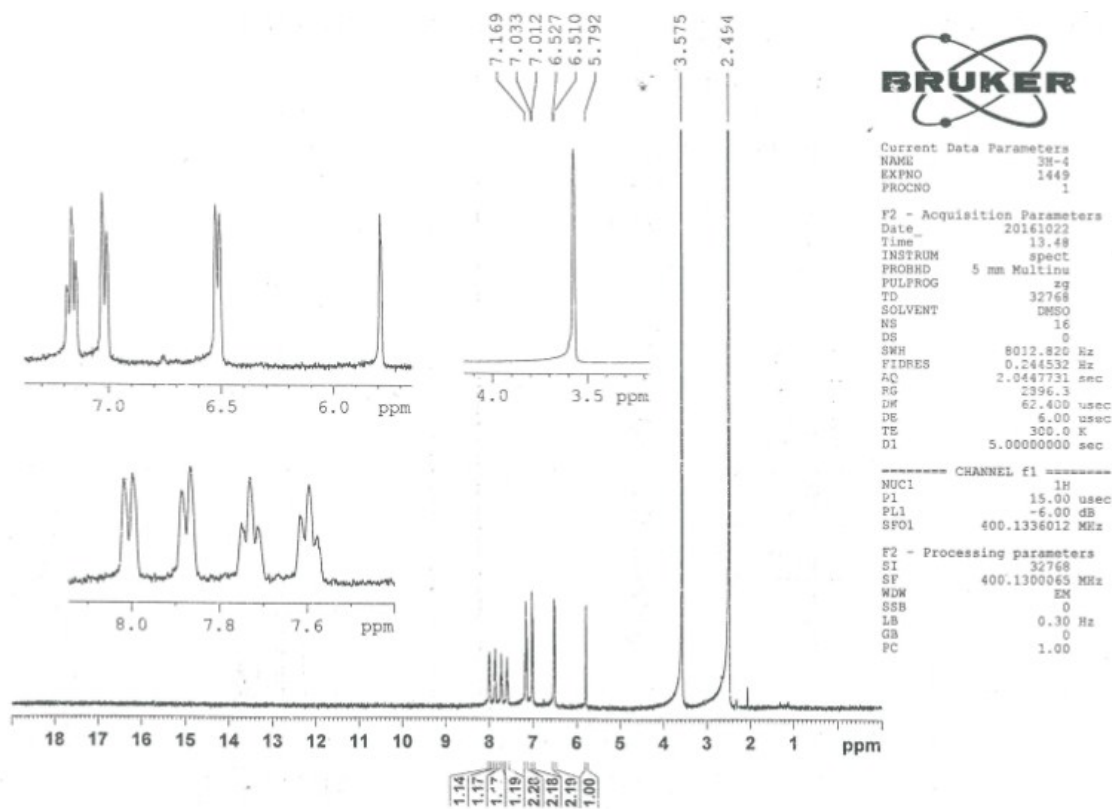

$^1\text{H}$  NMR spectrum of 2-(2-nitrophenyl)-2,3-dihydro-1H-perimidine in the presence of  $\text{D}_2\text{O}$

**2-(3-Nitrophenyl)-2,3-dihydro-1H-perimidine (Table 2, 3c).** IR (KBr): 3343, 3227, 3039, 2925, 1602, 1526, 1416  $\text{cm}^{-1}$ .  $^1\text{H}$ NMR (DMSO, 400MHz): 5.6 (s, 1H, CH), 6.50 (d, 2H,  $J=7.2$  Hz). 6.976 (s, 1H, NH, exchange with  $\text{D}_2\text{O}$ ), 7 (d, 2H,  $J=8.4$  Hz) 7.158(t, 2H,  $J=7.6$  Hz) 7.66 (t, 1H,  $J=8$  Hz) 7.98(d, 1H,  $J=7.6$  Hz), 8.19 (d, 1H,  $J=6.8$ Hz) 8.37 (s, 1H)  $^{13}\text{C}$ NMR (DMSO, 75 MHz) [23]:  $\delta$  65.3, 105.1, 112.9, 116.1, 123.1, 123.7, 127.4, 130.4, 134.8, 135.1, 142.7, 145.0, 148.1.

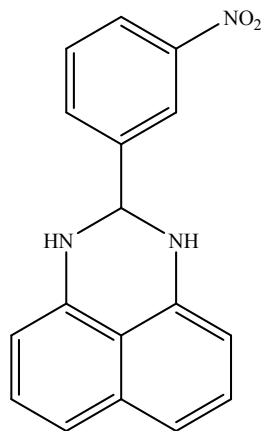

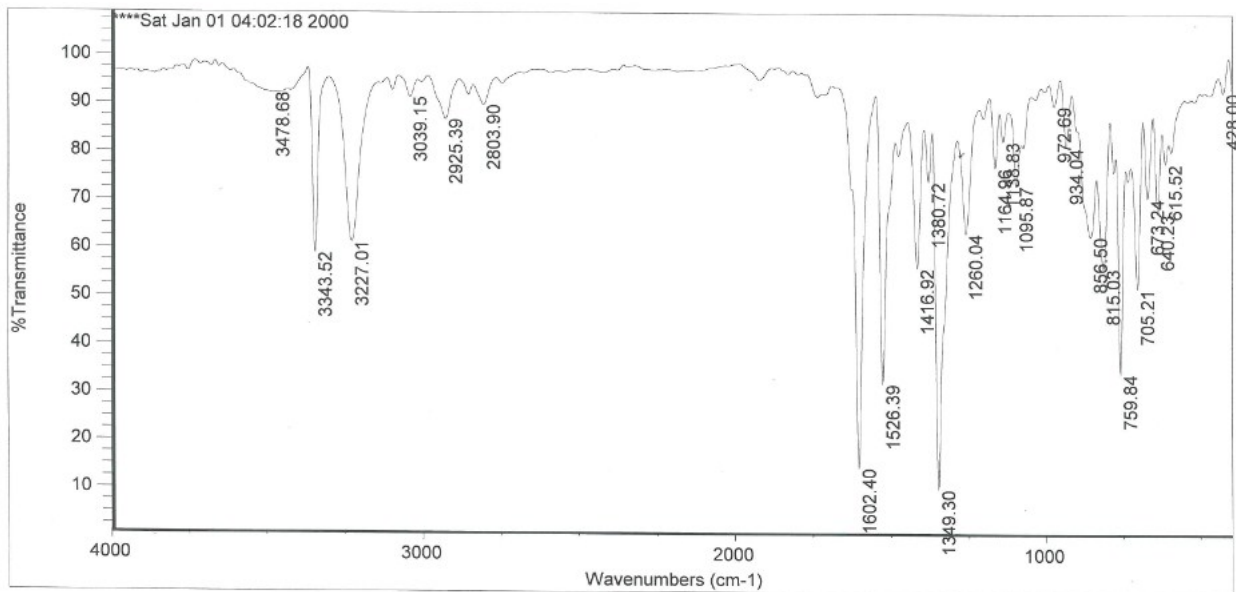

FT-IR spectrum 2-(3-Nitrophenyl)-2, 3-dihydro-1Hperimidine

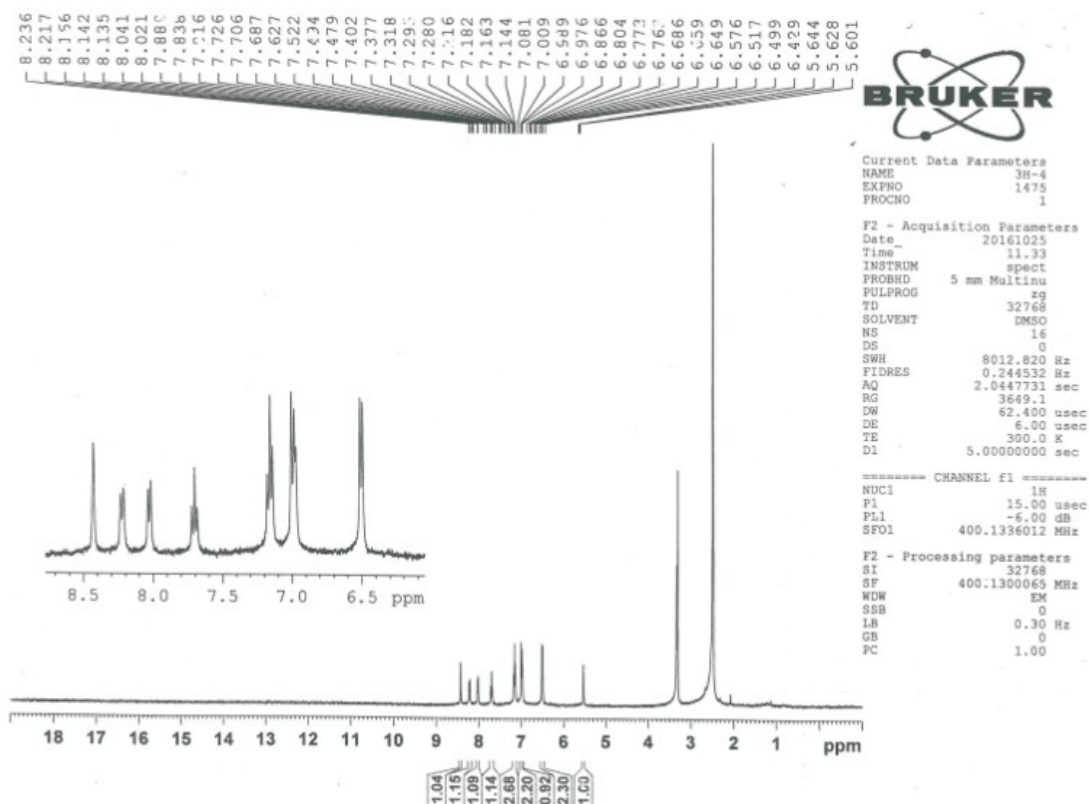

<sup>1</sup>H NMR spectrum 2-(3-Nitrophenyl)-2, 3-dihydro-1Hperimidine

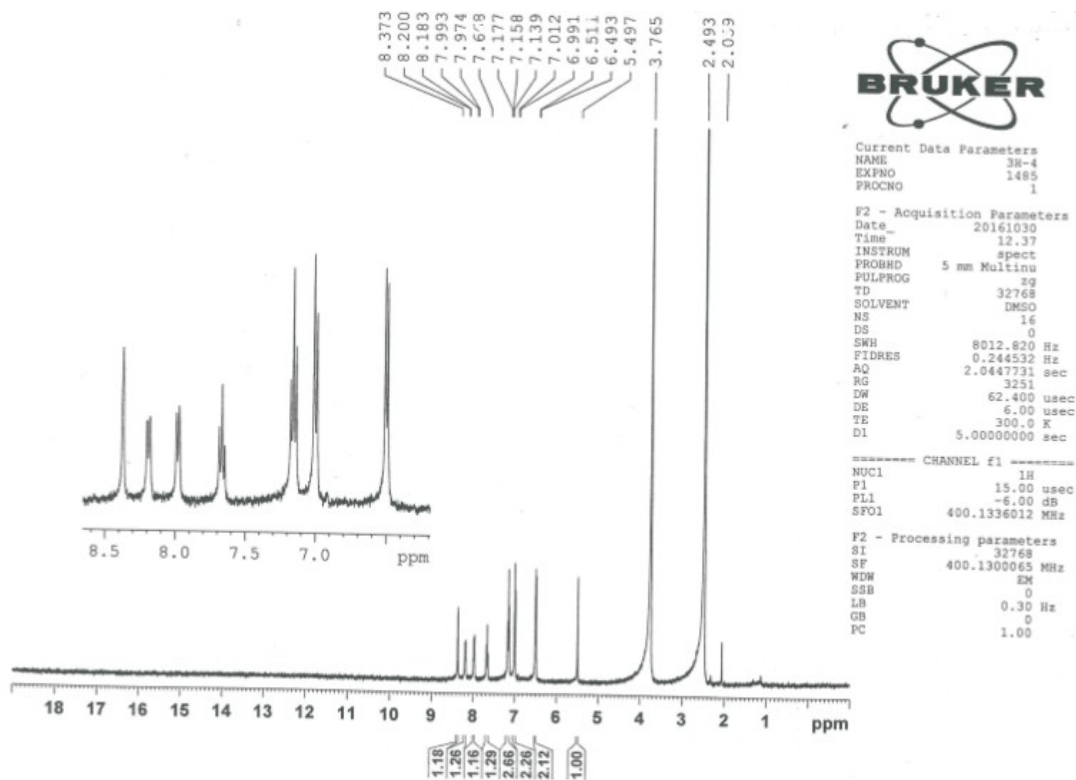

**<sup>1</sup>H NMR spectrum 2-(3-Nitrophenyl)-2, 3-dihydro-1Hperimidine in the presence of D<sub>2</sub>O**

**2-(4-Nitrophenyl)-2, 3-dihydro-1Hperimidine (Table 2, 3d).** IR (KBr): 3365, 3100, 3066, 2798, 1601, 1512, 1413 cm<sup>-1</sup>. <sup>1</sup>HNMR (DMSO, 400MHz): 3.34 (s, 1H, NH, exchange with D<sub>2</sub>O), 5.52 (s, 1H, CH), 6.49 (d, 2H, *J*=6.8 Hz). 6.98 (d, 3H, *J*=8.8 Hz), 7.158(t, 2H, *J*=7.6 Hz), 8.19 (d, 2H, *J*= 8.8Hz) 8.25 (d, 2H, *J*= 8.4Hz) <sup>13</sup>CNMR (DMSO) [28]: δ 64.8, 104.5, 112.3, 115.5, 123.3, 126.8, 128.9, 134.2, 141.9, 147.3, 149.8.

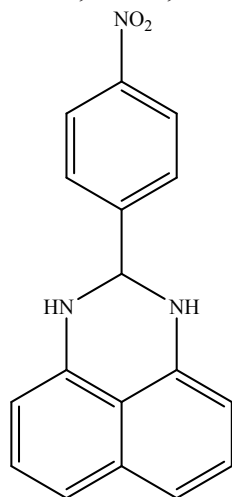

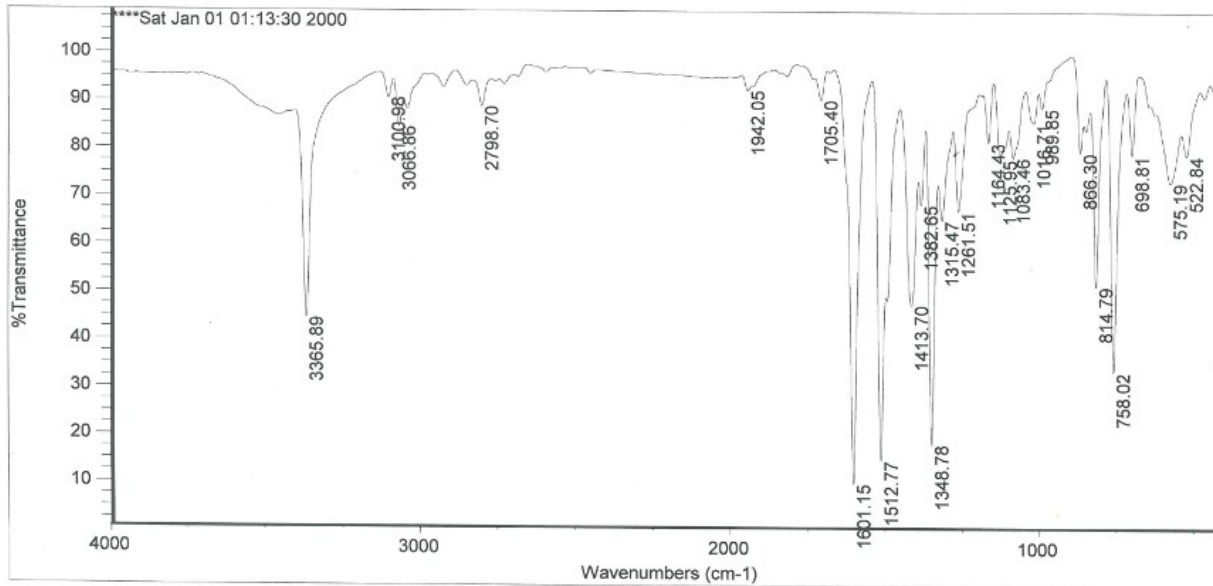

FT-IR spectrum of 2-(4-Nitrophenyl)-2,3-dihydro-1H-perimidine

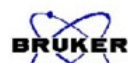

Current Data Parameters  
 NAME 30-4  
 EXPNO 1511  
 PROCNO 1

F2 - Acquisition Parameters  
 Date\_ 20161105  
 Time 8.22  
 INSTRUM spect  
 PROBRD 5 mm Malinn  
 PULPROG zg  
 TD 32768  
 SOLVENT DMSO  
 NS 16  
 DS 0  
 SWH 8012.820 Hz  
 FIDRES 0.244532 Hz  
 AQ 2.8447731 sec  
 RG 496  
 DW 62.400 msec  
 DE 6.00 msec  
 TE 300.0 K  
 DI 5.00000000 sec

CHANNEL f1

NEC1 1H  
 P1 15.00 msec  
 PL1 -6.00 dB  
 SFO1 400.1336012 MHz

F2 - Processing parameters  
 SI 32768  
 SF 400.1306065 MHz  
 WDW EM  
 SSB 0  
 LB 0.30 Hz  
 GB 0  
 PC 1.00

ID NMR phr parameters  
 CX 20.00 cm  
 CY 20.00 cm  
 F1P 0.000 ppm  
 F1 3601.17 Hz  
 F2P 5.000 ppm  
 F2 2000.65 Hz  
 PPM1CM 0.20000 ppm/cm  
 HZ1CM 80.02600 Hz/cm

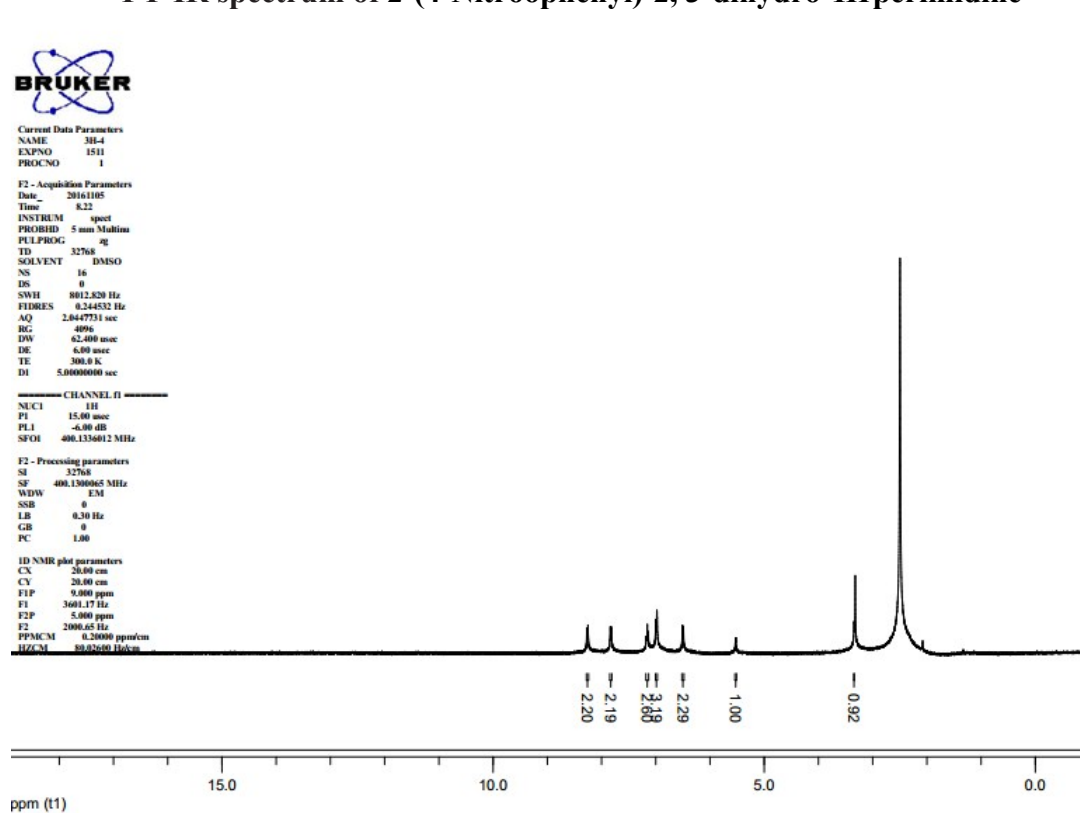

$^1\text{H}$  NMR spectrum of 2-(4-Nitrophenyl)-2,3-dihydro-1H-perimidine



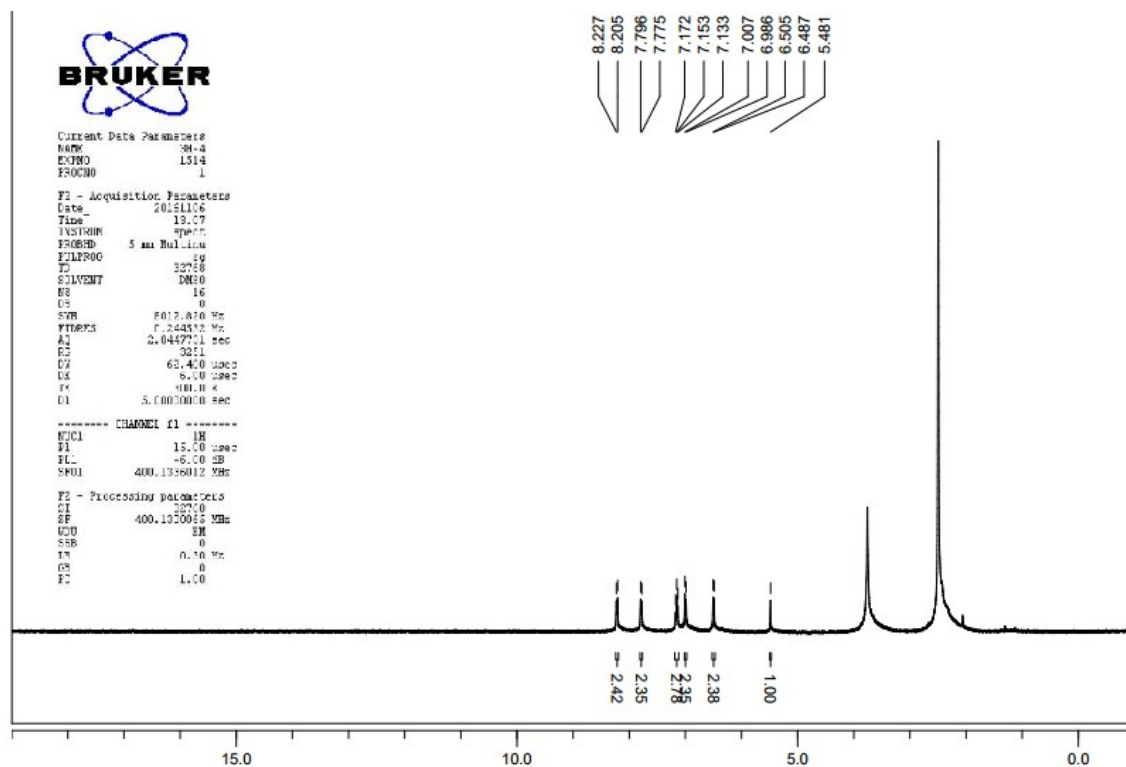

**<sup>1</sup>H NMR spectrum of 2-(4-Nitrophenyl)-2,3-dihydro-1H-perimidine in the presence of D<sub>2</sub>O**

**2-(4-Carboxyphenyl)-2,3-dihydro-1H-perimidine (Table 2, 3e).** IR (KBr): 3622, 3374, 3230, 2924, 1685, 1599, 1480, 1413 cm<sup>-1</sup>. <sup>1</sup>HNMR (DMSO, 400MHz): 5.42 (s, 1H, CH), 6.49 (d, 2H, *J*=7.2 Hz), 6.85 (s, 2H, NH, exchange with D<sub>2</sub>O), 6.98 (d, 2H, *J*=8 Hz), 7.146 (t, 2H, *J*=7.6 Hz), 7.69 (d, 2H, *J*= 8Hz), 7.97 (d, 2H, *J*= 8Hz). <sup>13</sup>CNMR (DMSO, 75 MHz): ?

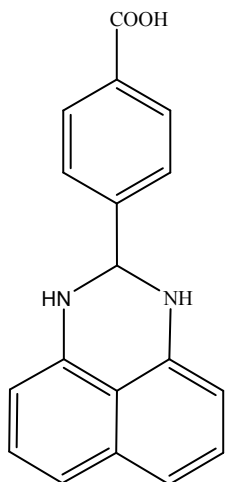

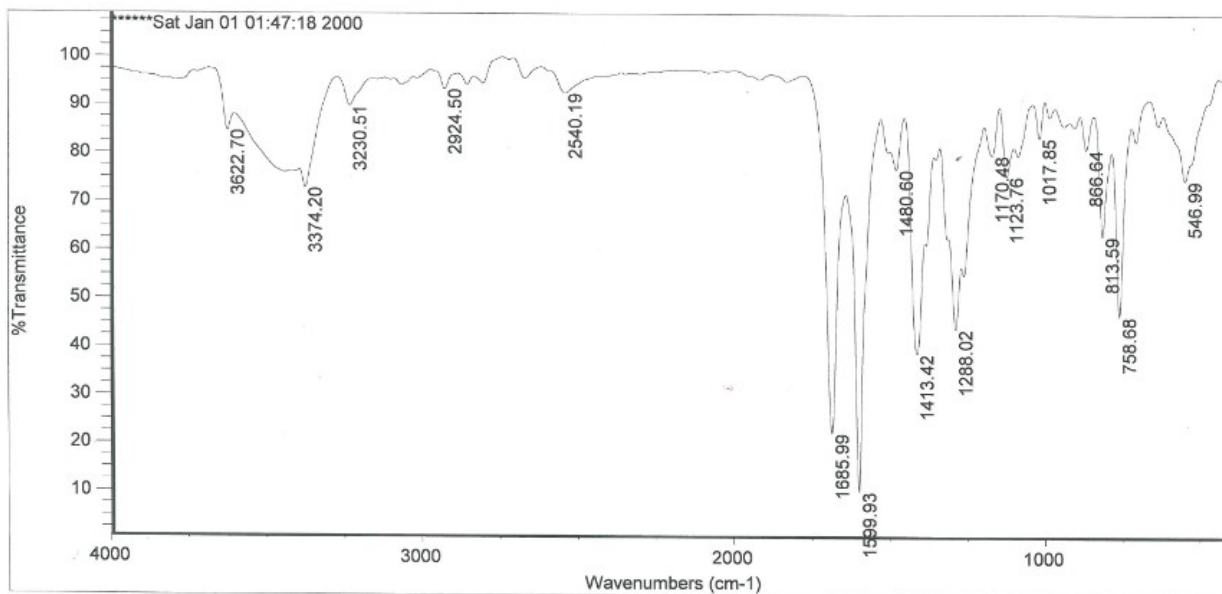

FT-IR spectrum of 2-(4-Carboxyphenyl)-2,3-dihydro-1H-perimidine

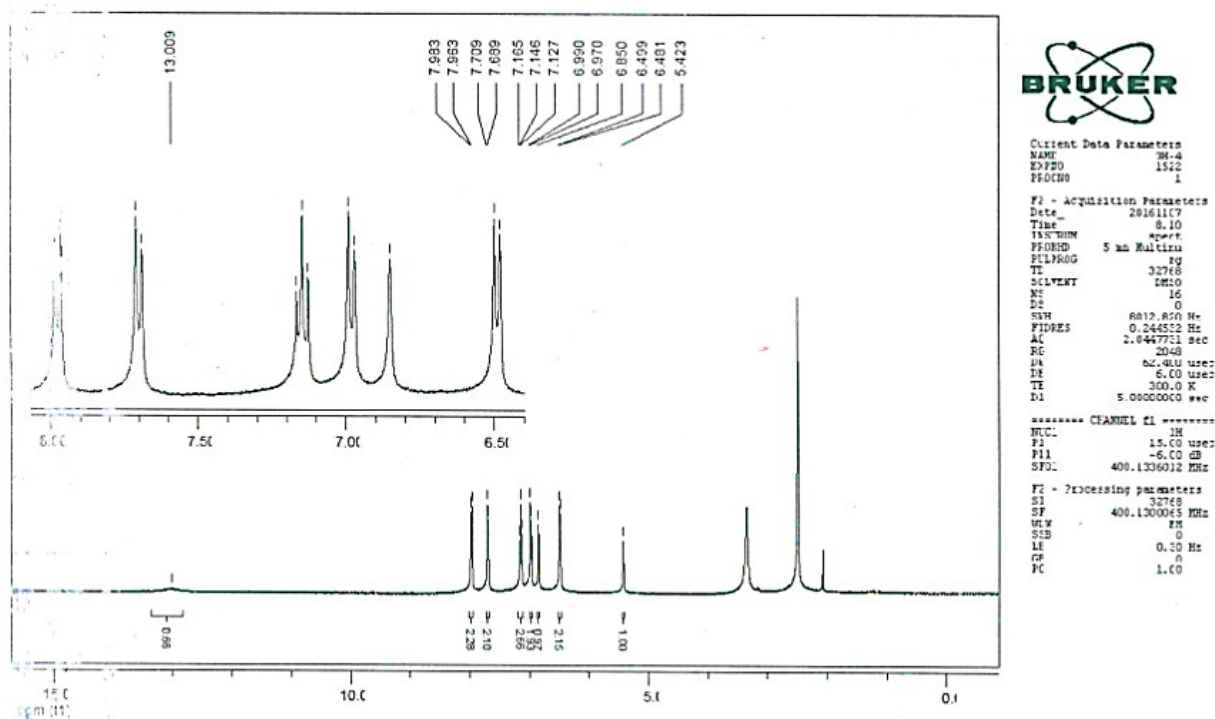

<sup>1</sup>H NMR spectrum of 2-(4-Carboxyphenyl)-2,3-dihydro-1H-perimidine

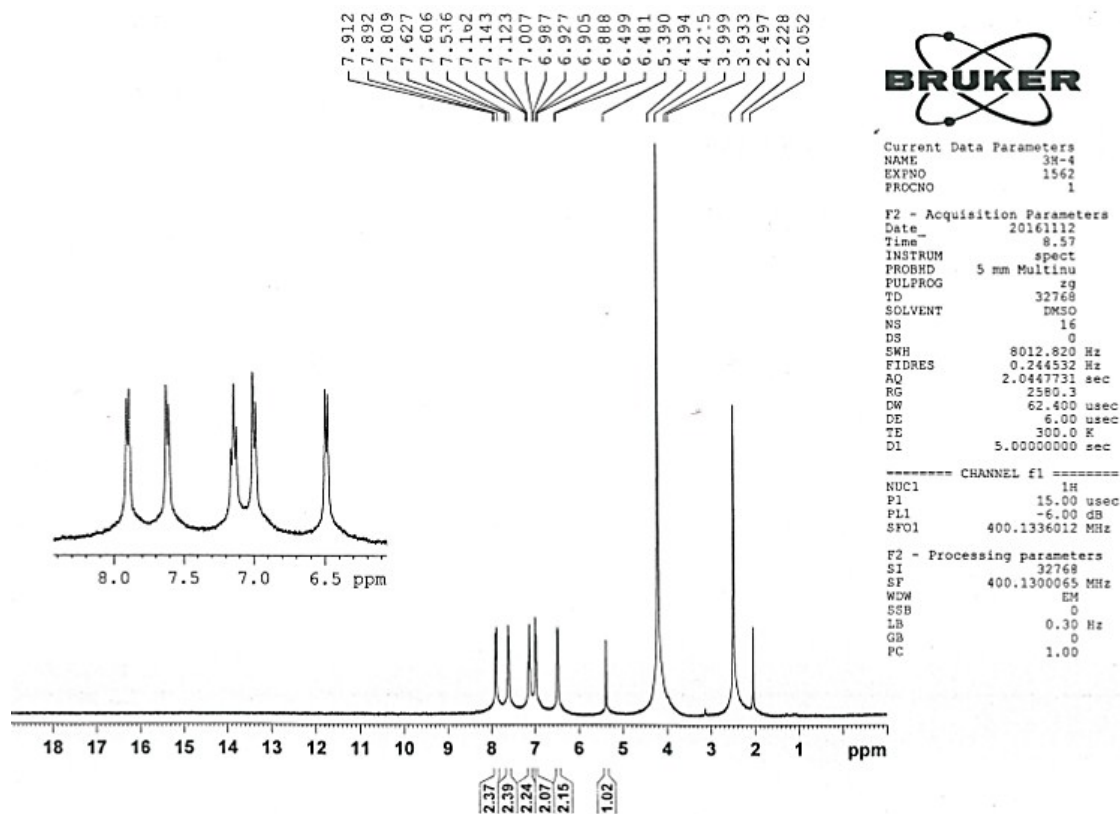

**<sup>1</sup>H NMR spectrum of 2-(4-Carboxyphenyl)-2,3-dihydro-1H-perimidine in the presence of D<sub>2</sub>O**

**2-(4-Dimethylaminophenyl)-2,3-dihydro-1H-perimidine (Table 2, 3f).** IR (KBr): 3367, 3038, 2891, 1598, 1527, 1478, 1414 cm<sup>-1</sup>. <sup>1</sup>HNMR (DMSO, 400MHz): 2.891 (s, 6H, 2CH<sub>3</sub>), 3.34(s, 1H, NH, exchange with D<sub>2</sub>O), 5.21 (s, 1H, CH), 6.45 (d, 2H, *J*=7.2 Hz), 6.57 (s, 1H, NH, exchange with D<sub>2</sub>O), 6.75 (d, 2H, *J*=8 Hz), 6.94 (d, 2H, *J*=8 Hz), 7.11 (t, 2H, *J*=6.8 Hz), 7.39 (d, 2H, *J*=7.2 Hz), <sup>13</sup>CNMR (DMSO) [28]: 40.2, 66.2, 104.1, 111.9, 112.4, 114.9, 126.7, 128.4, 129.0, 134.3, 143.4, 150.8.

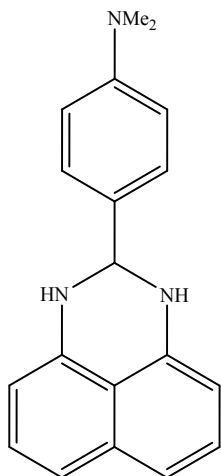

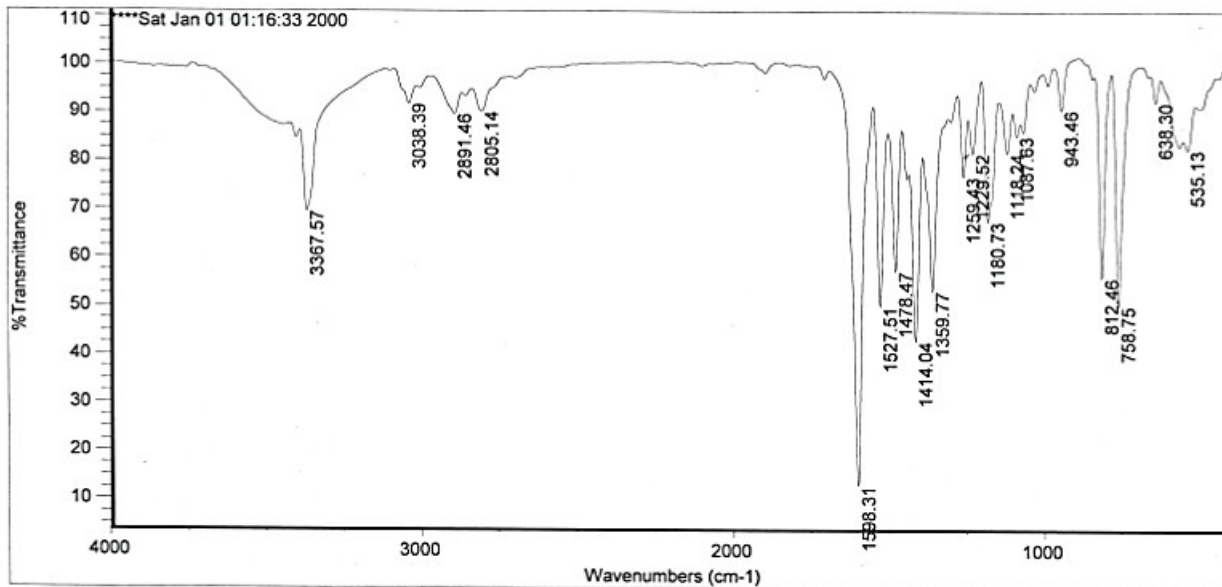

FT-IR spectrum of 2-(4-Dimethylaminophenyl)-2,3-dihydro-1H-perimidine

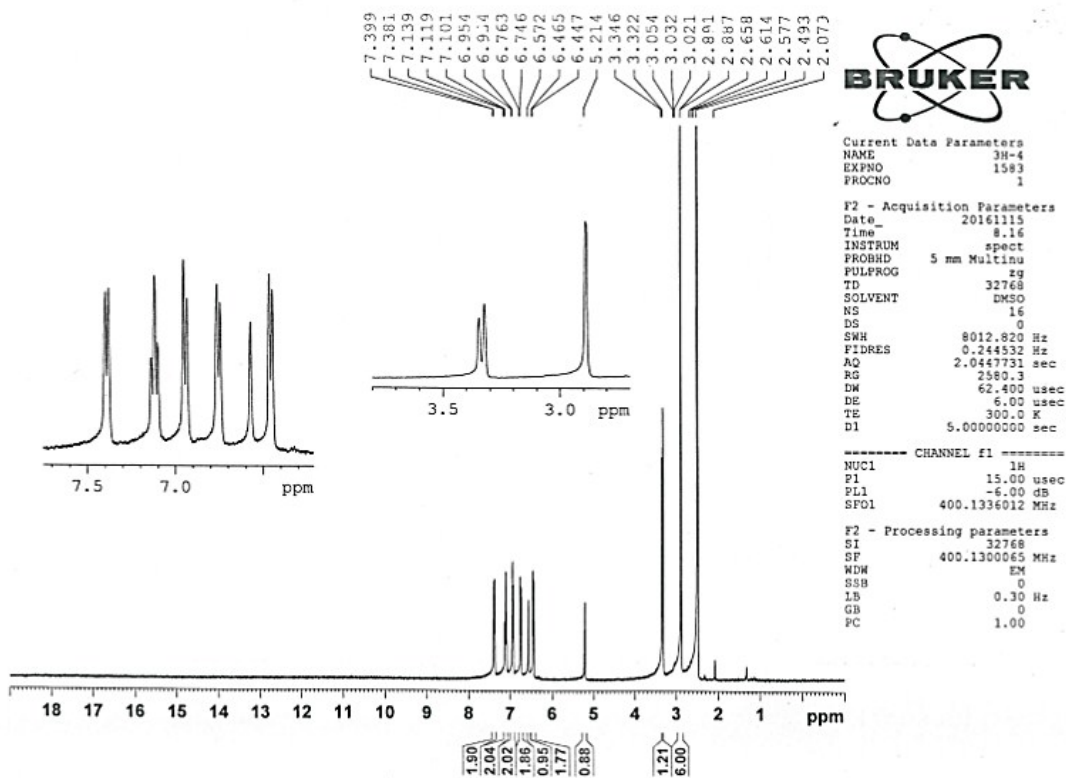

<sup>1</sup>H NMR spectrum of 2-(4-Dimethylaminophenyl)-2,3-dihydro-1H-perimidine

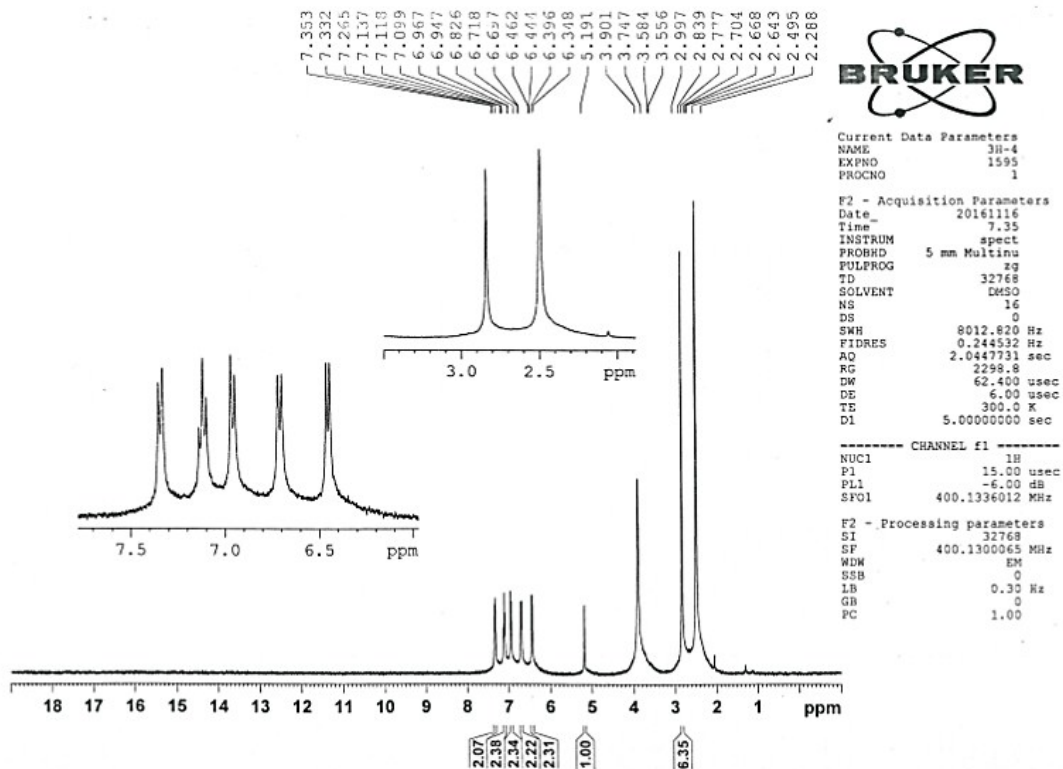

**<sup>1</sup>H NMR spectrum of 2-(4-Dimethylaminophenyl)-2,3-dihydro-1Hperimidine in the presence of D<sub>2</sub>O**

**2-(4-methoxyphenyl)-2,3-dihydro-1Hperimidine (Table 2, 3g).** IR (KBr): 3365, 3036, 2922, 1597, 1511, 1484, 1408 cm<sup>-1</sup>. <sup>1</sup>HNMR (DMSO, 400MHz): 3.76 (s, 3H, CH<sub>3</sub>), 5.28 (s, 1H, CH), 6.46 (d, 2H, *J*=7.2 Hz), 6.56 (s, 2H, NH, exchange with D<sub>2</sub>O), 6.96 (m, 4H, *J*=6.8 Hz), 7.12 (t, 2H, *J*=8 Hz), 7.50 (d, 2H, *J*=7.2 Hz), <sup>13</sup>C NMR (DMSO) [28]: 55.2, 66.0, 104.3, 112.5, 113.5, 115.2, 126.8, 129.1, 133.8, 134.4, 143.2, 159.5.

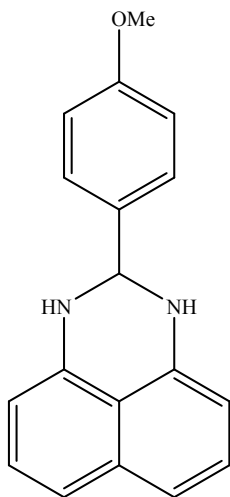

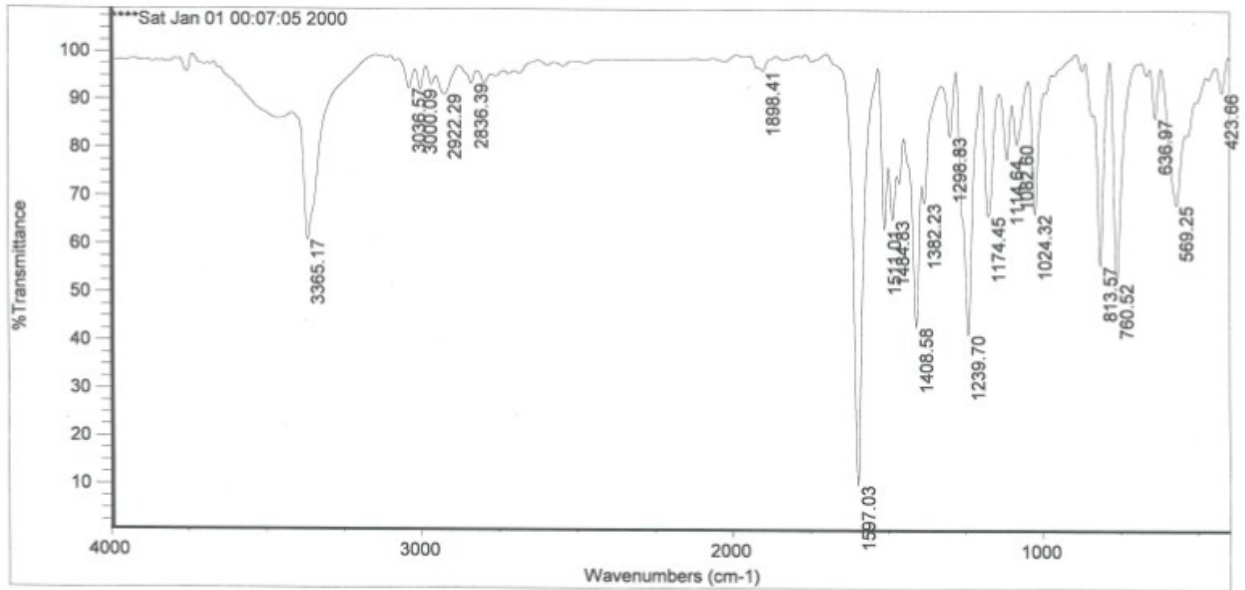

FT-IR spectrum of 2-(4-methoxyphenyl)-2,3-dihydro-1H-perimidine

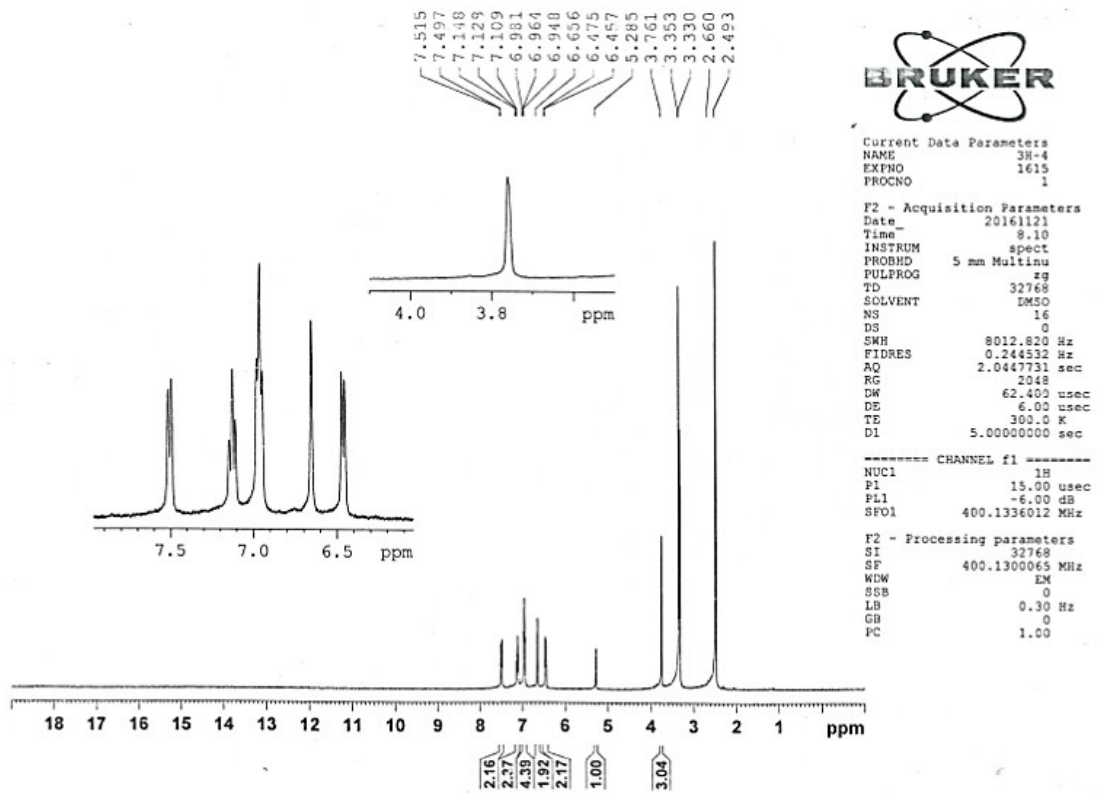

<sup>1</sup>H-NMR spectrum of 2-(4-methoxyphenyl)-2,3-dihydro-1H-perimidine

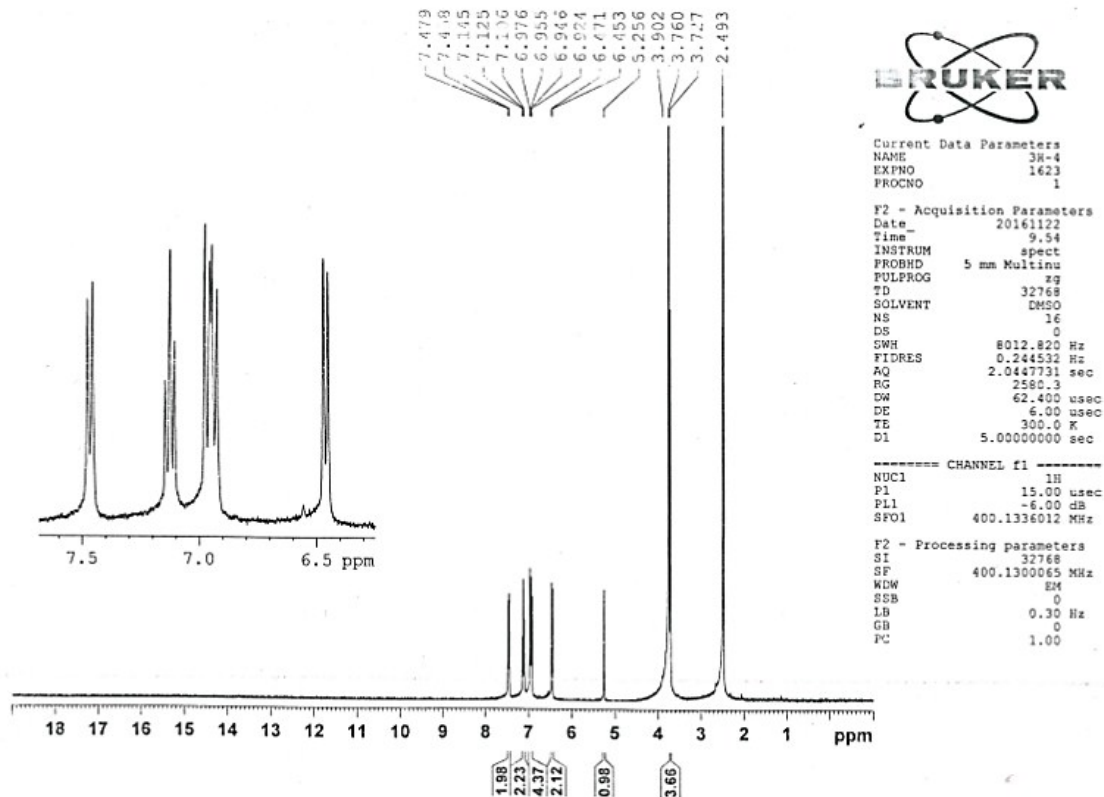

**<sup>1</sup>H NMR spectrum of 2-(4-methoxyphenyl)-2,3-dihydro-1H-perimidine in the presence of D<sub>2</sub>O**

**2-(2,4-Dimethoxyphenyl)-2,3-dihydro-1H-perimidine (Table 2, 3h).** IR (KBr): 3378, 3043, 2959, 1600, 1499, 1460, 1415 cm<sup>-1</sup>. <sup>1</sup>H NMR (DMSO, 400MHz): 3.76 (s, 3H, CH<sub>3</sub>), 3.81 (s, 3H, CH<sub>3</sub>), 5.60 (s, 1H, CH), 6.44 (s, 1H, NH, exchange with D<sub>2</sub>O), 6.47 (d, 2H, *J*=7.2 Hz), 6.56 (d, 1H, *J*=8 Hz), 6.60 (s, 1H), 6.94 (d, 2H, *J*=7.6Hz), 7.12 (t, 2H, *J*=8Hz), 7.44 (d, 1H, *J*=8Hz) <sup>13</sup>C NMR (DMSO): ?

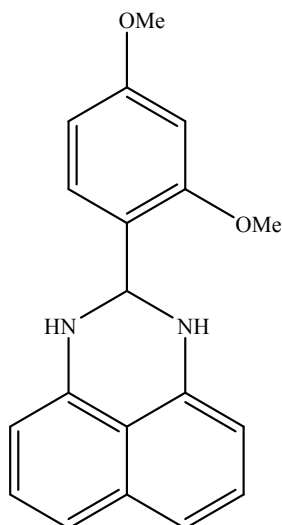

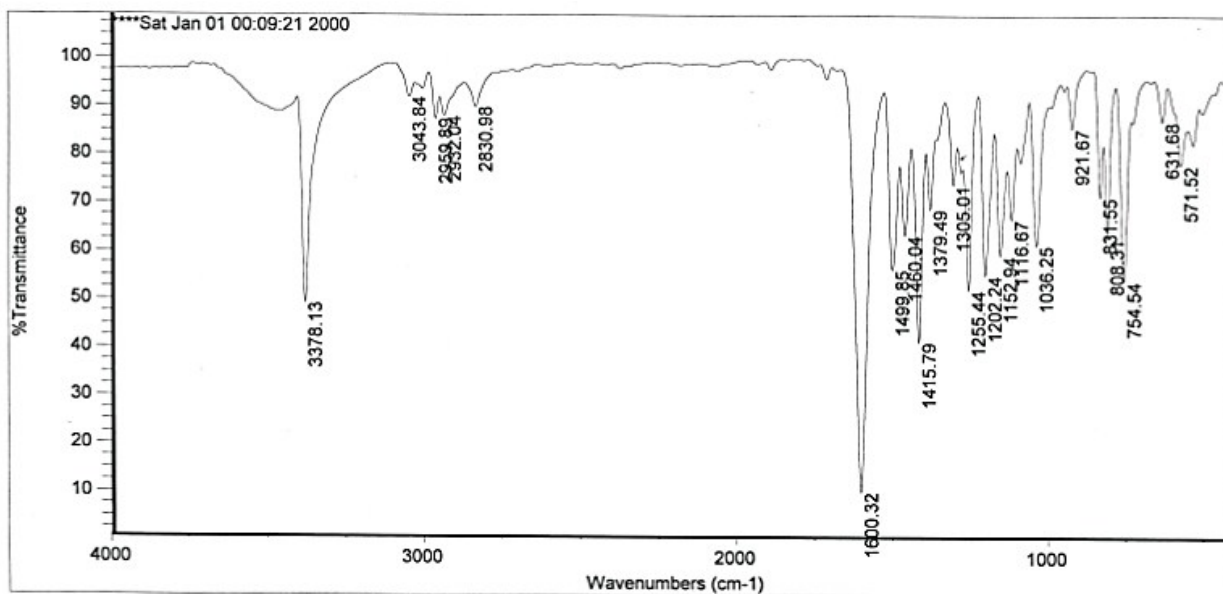

FT-IR spectrum of 2-(2,4-dimethoxyphenyl)-2,3-dihydro-1H-perimidine

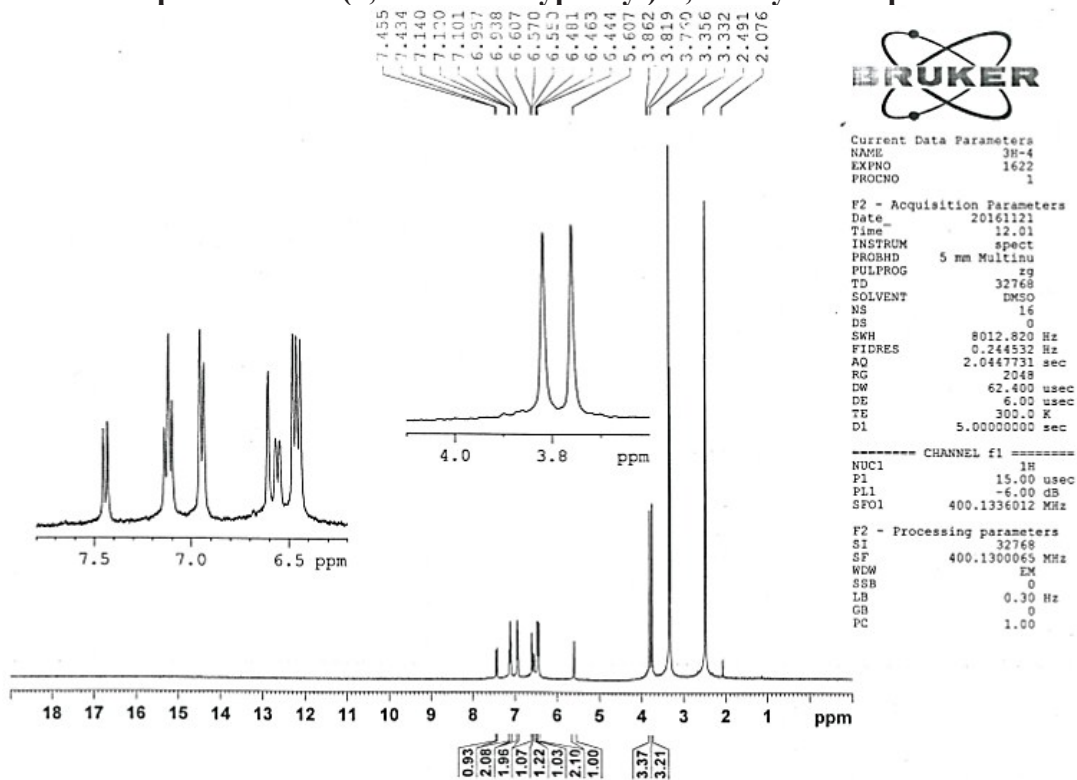

<sup>1</sup>H NMR spectrum of 2-(2,4-dimethoxyphenyl)-2,3-dihydro-1H-perimidine



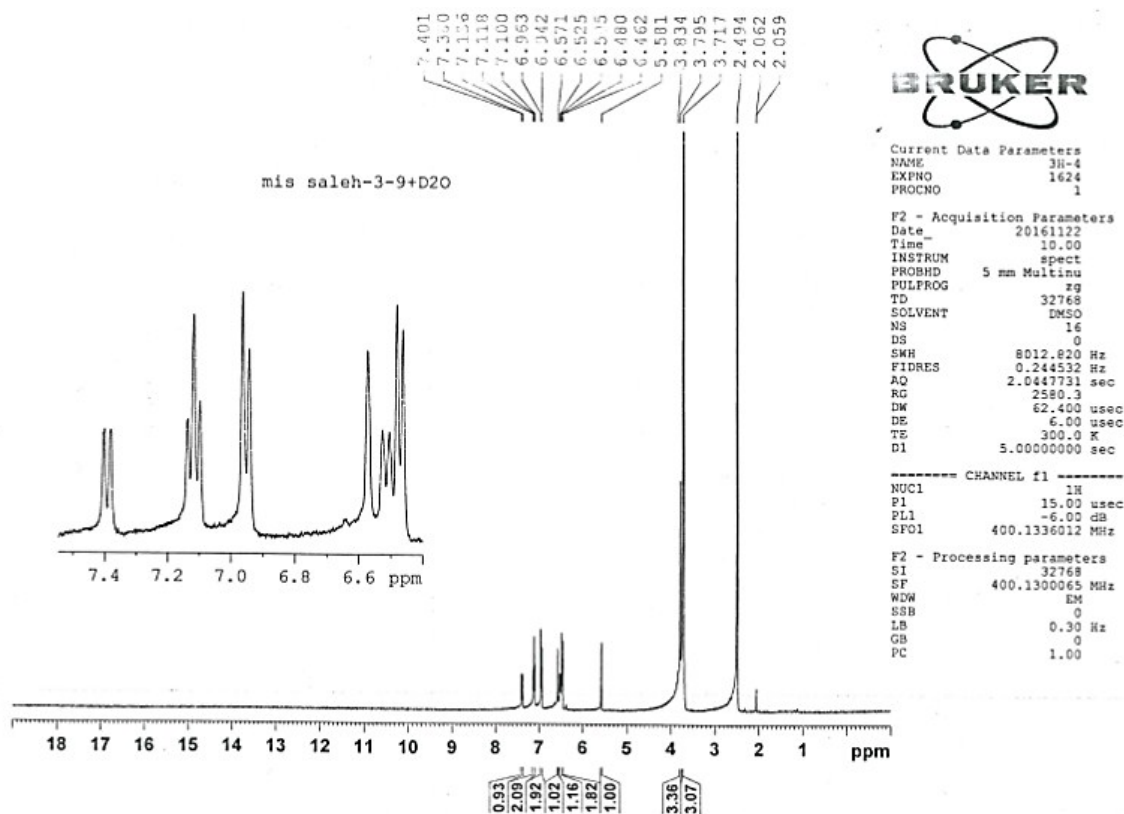

**<sup>1</sup>H NMR spectrum of 2-(2, 4-dimethoxyphenyl)-2, 3-dihydro-1Hperimidine in the presence of D<sub>2</sub>O**

**2-(2, 3-Dichlorophenyl)-2, 3-dihydro-1Hperimidine (Table 2, 3i).** IR (KBr): 3347, 3234, 3042, 2816, 1598, 1493, 1404 cm<sup>-1</sup>. <sup>1</sup>HNMR (DMSO, 400MHz): 3.35 (s, 1H, NH, exchange with D<sub>2</sub>O), 5.77 (s, 1H, CH), 6.5 (d, 2H, *J*=6.8 Hz), 6.83 (s, 1H, NH, exchange with D<sub>2</sub>O), 7.04 (d, 2H, *J*=8 Hz), 7.17 (m, 2H, *J*=7.2 Hz), 7.43 (m, 1H, *J*=7.6 Hz), 7.67 (d, 2H, *J*=6.8 Hz). <sup>13</sup>C NMR (DMSO):?

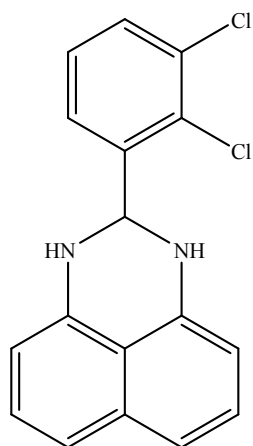

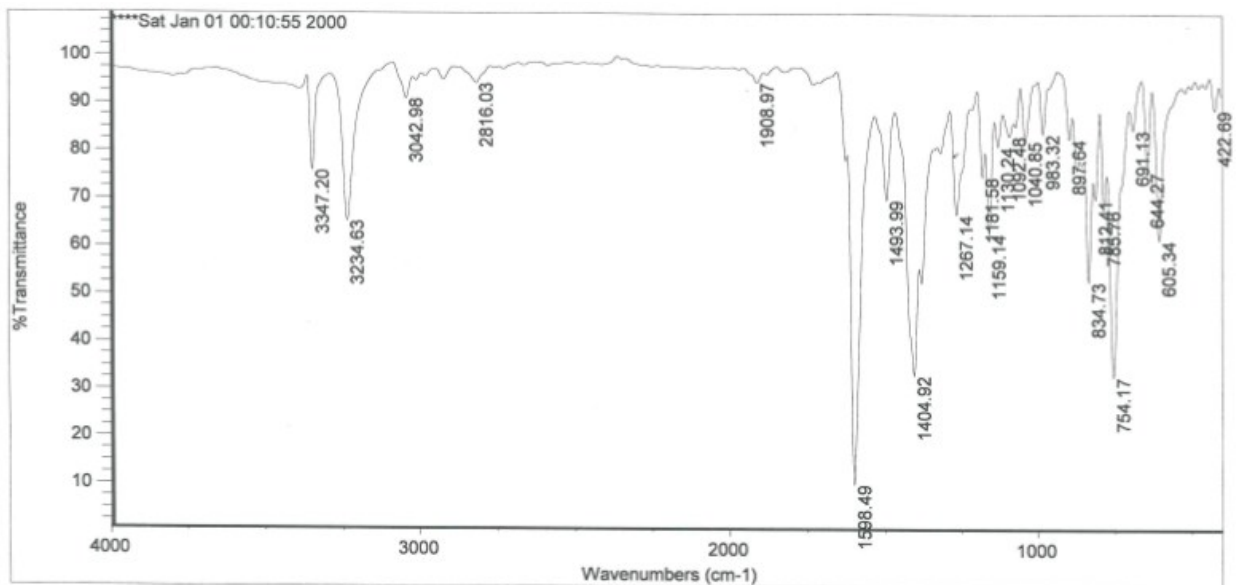

FT-IR spectrum of 2-(2,3-Dichlorophenyl)-2,3-dihydro-1H-perimidine

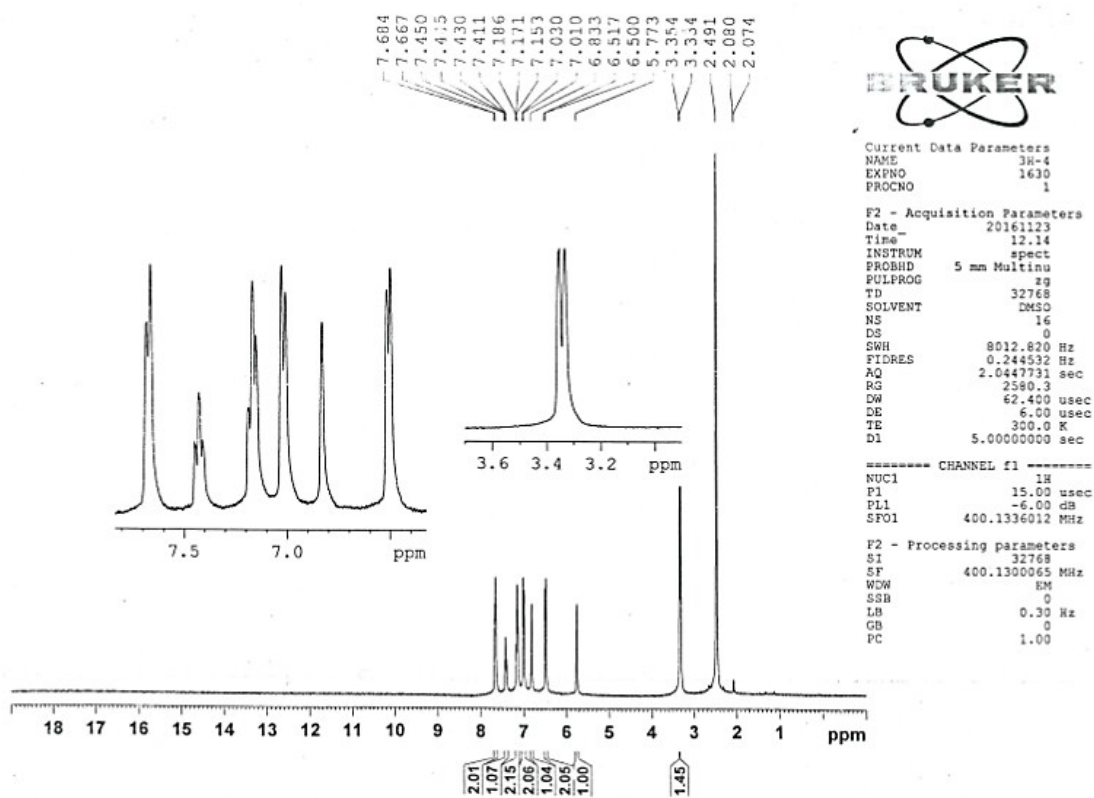

<sup>1</sup>H NMR spectrum of 2-(2,3-Dichlorophenyl)-2,3-dihydro-1H-perimidine

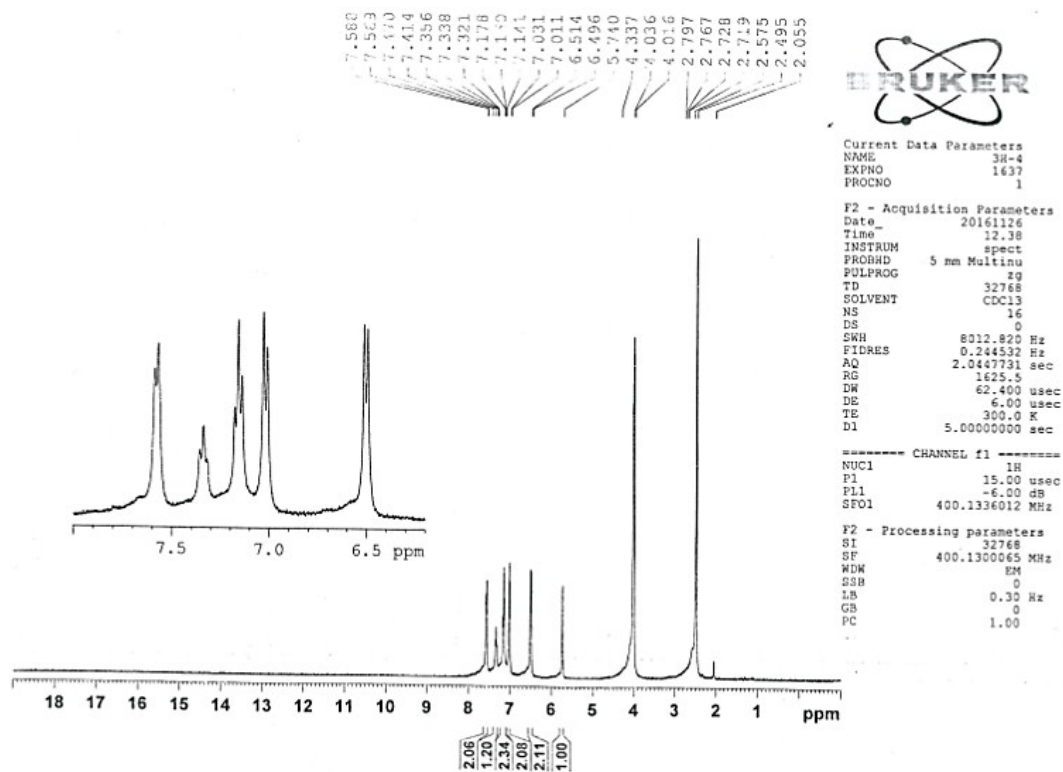

**<sup>1</sup>H NMR spectrum of 2-(2,3-Dichlorophenyl)-2,3-dihydro-1H-perimidine in the presence of D<sub>2</sub>O**

**2-(2,3-Dimethoxyphenyl)-2,3-dihydro-1H-perimidine (Table 2, 3j).** IR (KBr): 3360, 3045, 2932, 1595, 1480, 1422 cm<sup>-1</sup>. <sup>1</sup>H NMR (DMSO, 400MHz): 3.79 (s, 3H, CH<sub>3</sub>), 3.82 (s, 3H, CH<sub>3</sub>), 5.65 (s, 1H, CH), 6.48 (d, 2H, *J*=7.2 Hz), 6.55 (s, 2H, NH, exchange with D<sub>2</sub>O), 6.97 (d, 3H, *J*=7.2 Hz), 7.05 (d, 2H, *J*=10 Hz), 7.12 (d, 2H, *J*=8Hz). <sup>13</sup>C NMR (DMSO):?

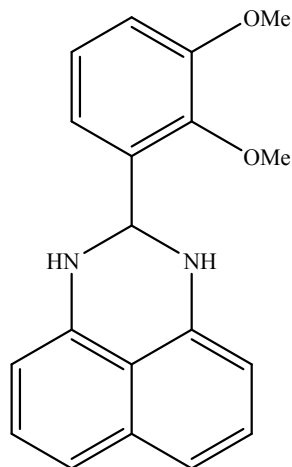

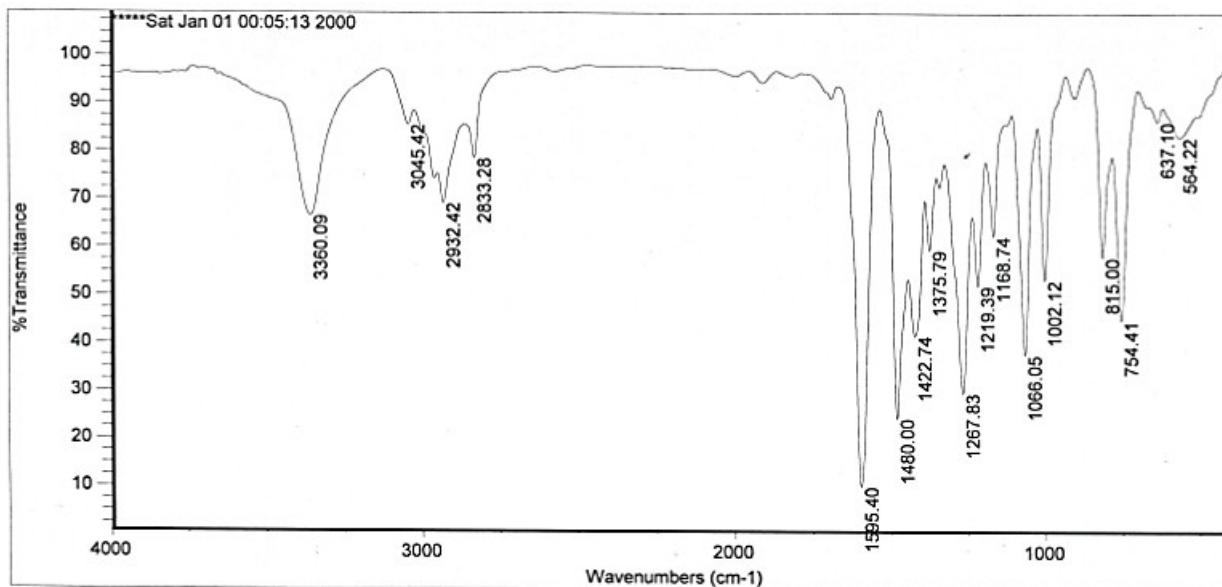

FT-IR spectrum of 2-(2,3-dimethoxyphenyl)-2,3-dihydro-1H-perimidine

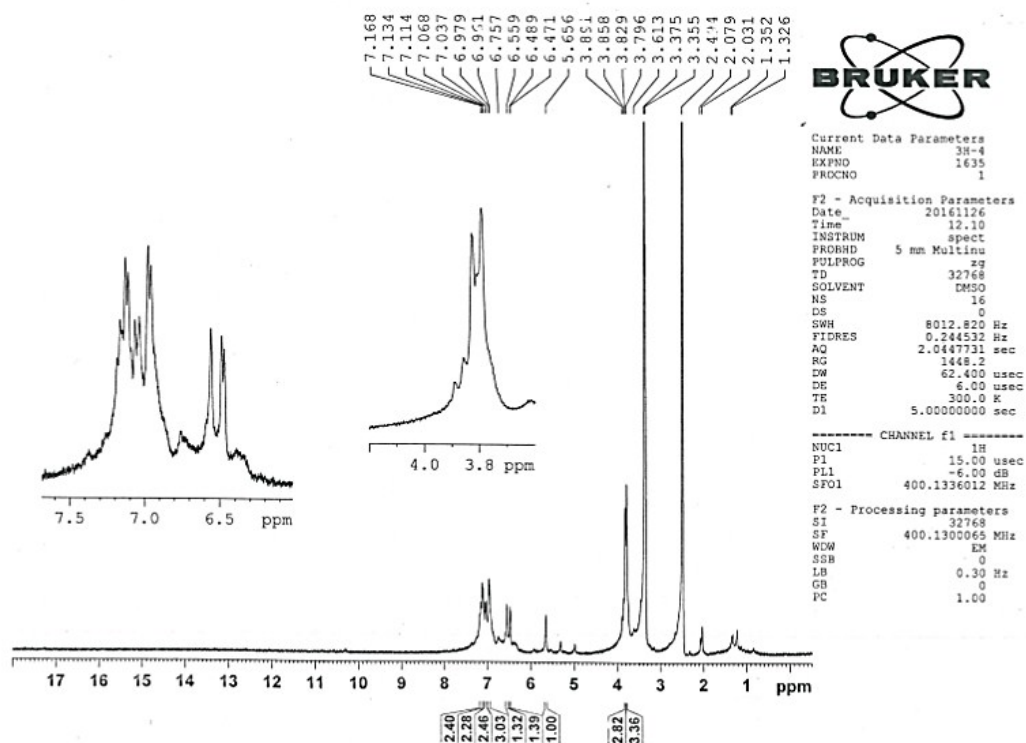

<sup>1</sup>H NMR spectrum of 2-(2,3-dimethoxyphenyl)-2,3-dihydro-1H-perimidine



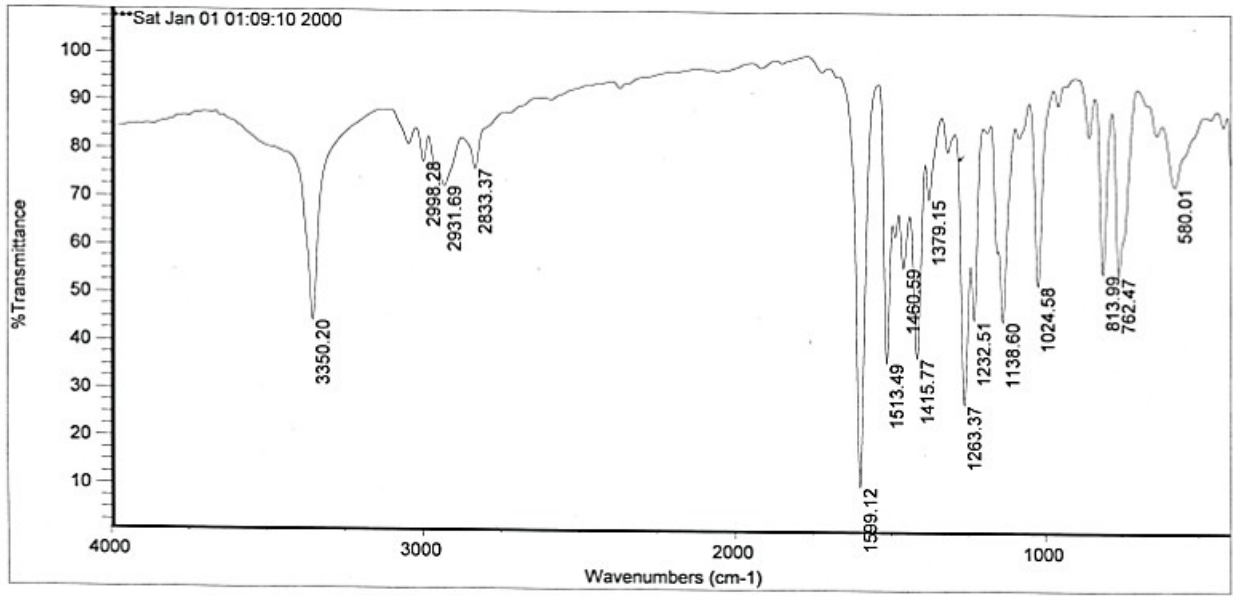

FT-IR spectrum of 2-(3,4-dimethoxyphenyl)-2,3-dihydro-1H-perimidine

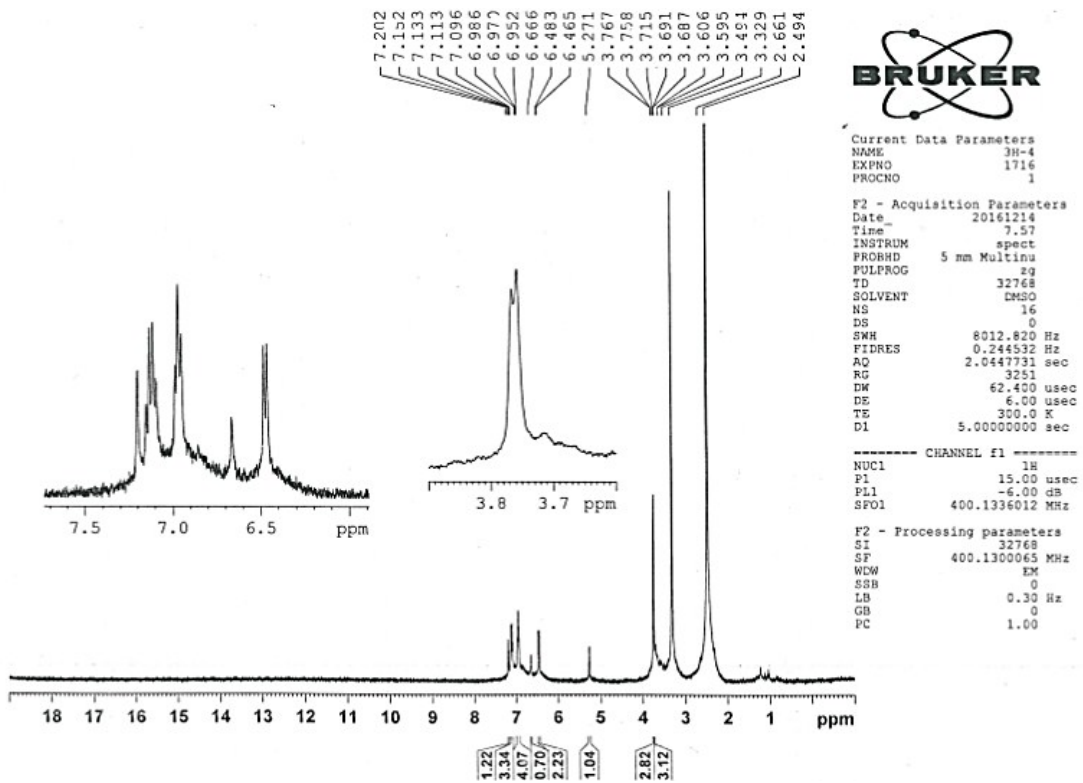

<sup>1</sup>H NMR spectrum of 2-(3,4-dimethoxyphenyl)-2,3-dihydro-1H-perimidine

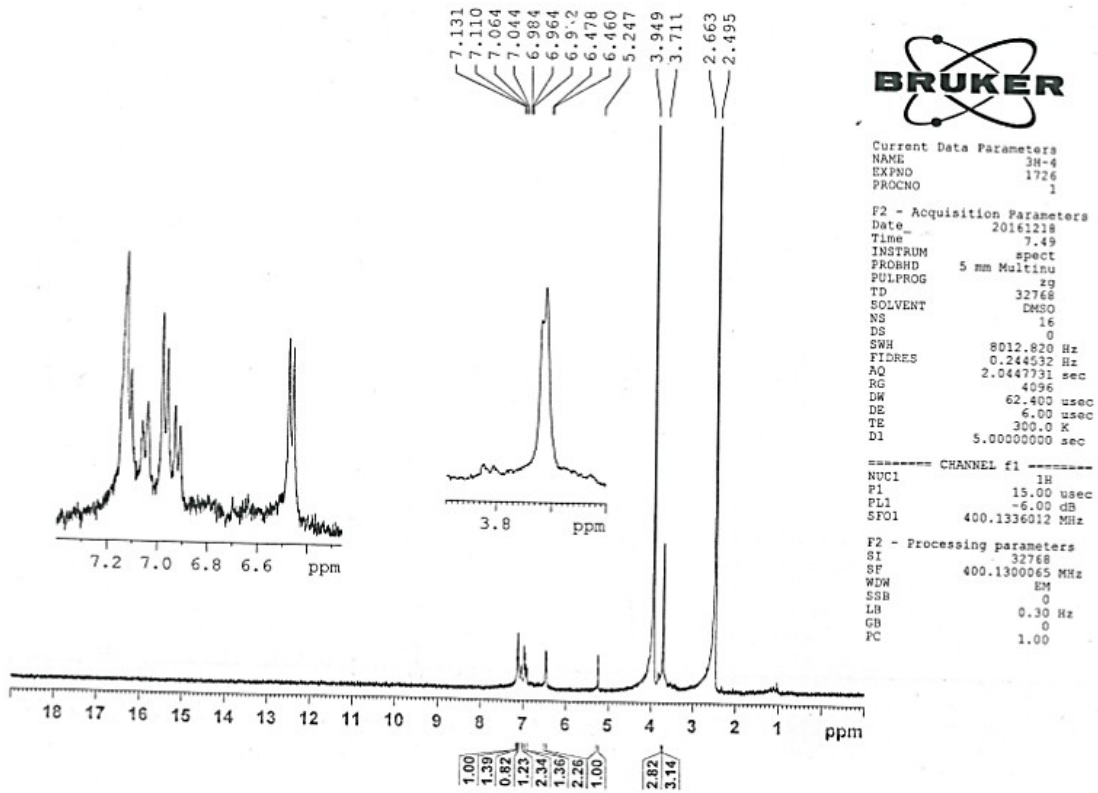

**<sup>1</sup>H NMR spectrum of 2-(3, 4-dimethoxyphenyl)-2, 3-dihydro-1H-perimidine  
in the presence of D<sub>2</sub>O**
